# Supplementary material for: Intravesical treatment for interstitial cystitis/painful bladder syndrome: a network meta-analysis
Source: Springer Nature journal article supplement (doi:10.1007/s00192-016-3079-4), 2016-09-10
Supplement: MOESM1 [file 10687290]

## Supplementary Material

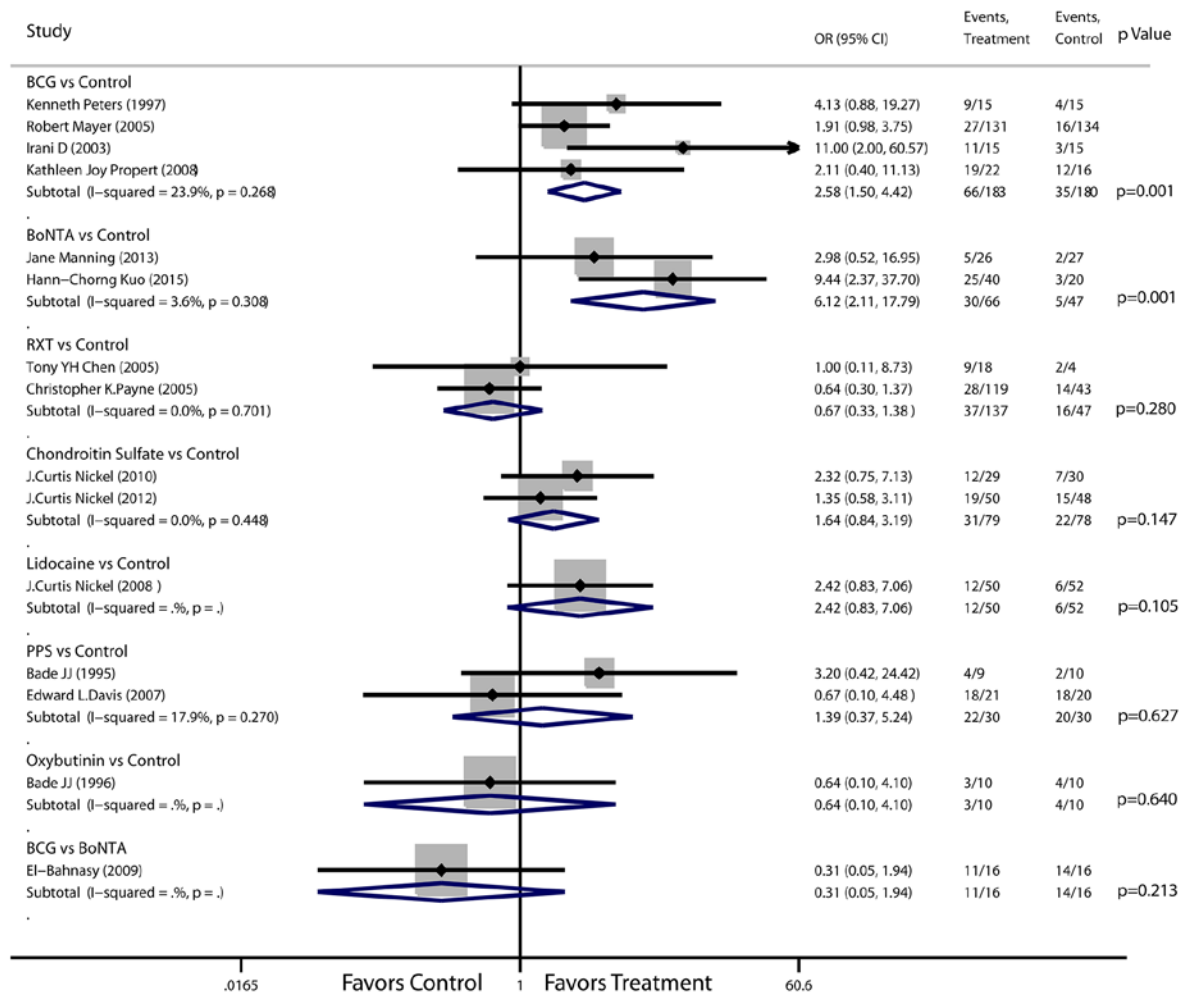

**Figure S1. Results of GRA on IC/PBS patients.**

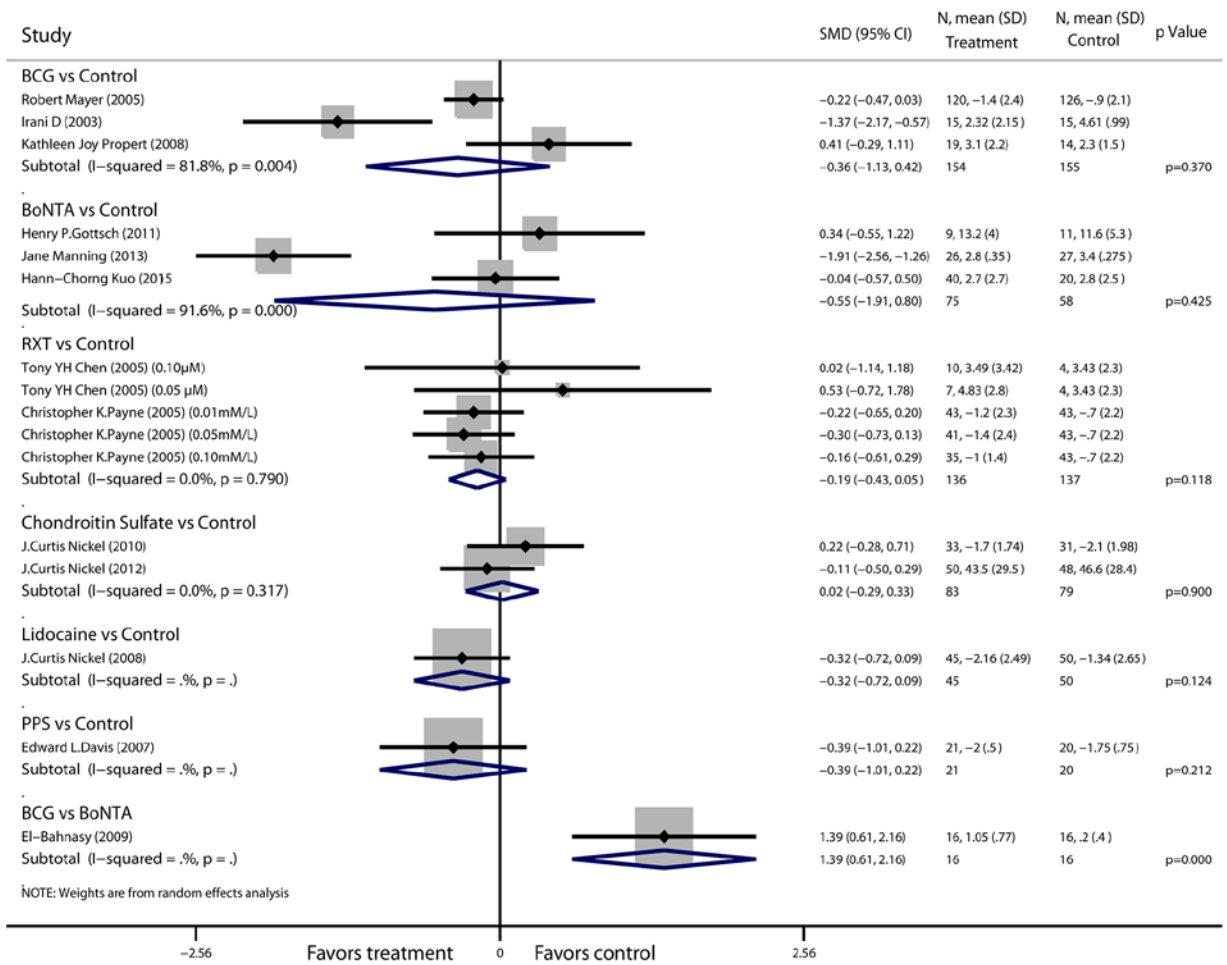

**Figure S2. Results of pain on IC/PBS patients.**

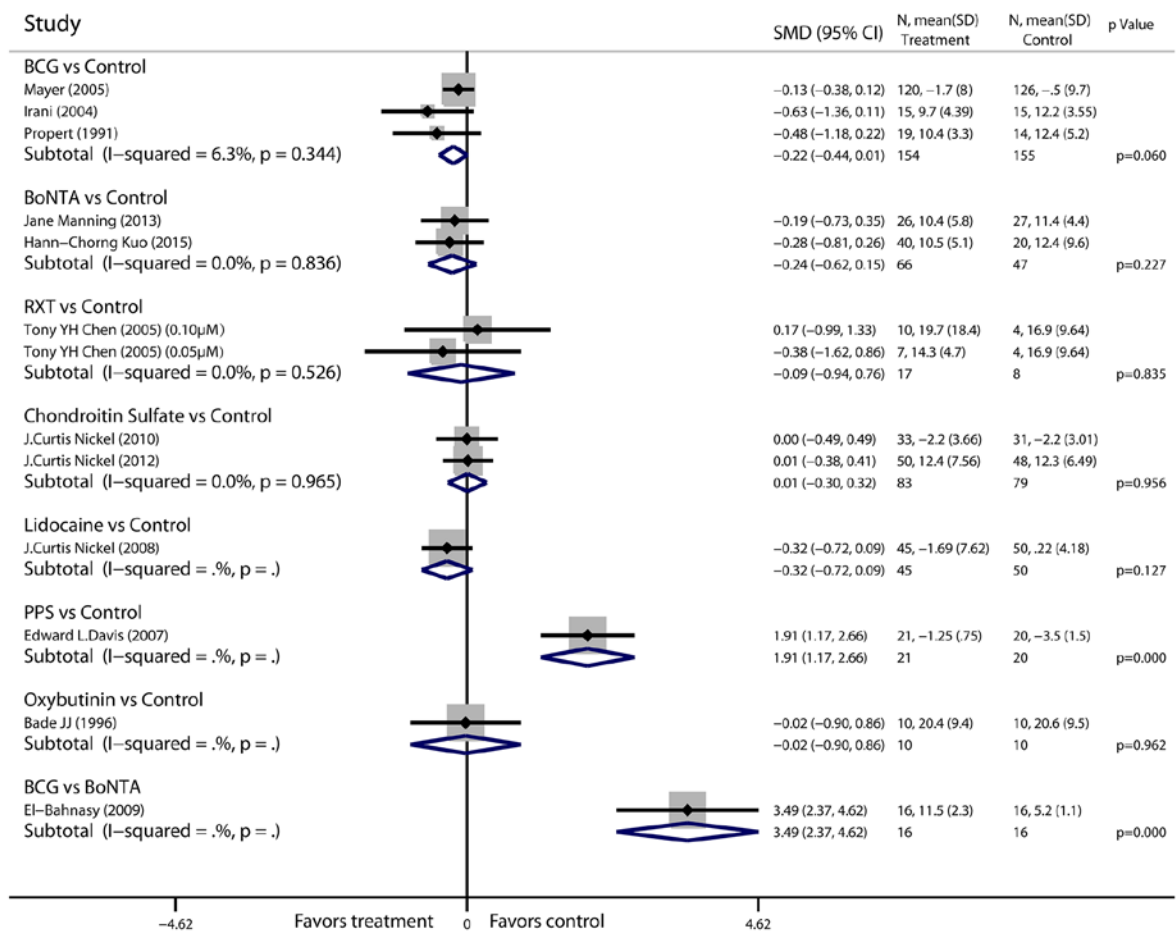

**Figure S3. Results of urinary frequency on IC/PBS patients.**

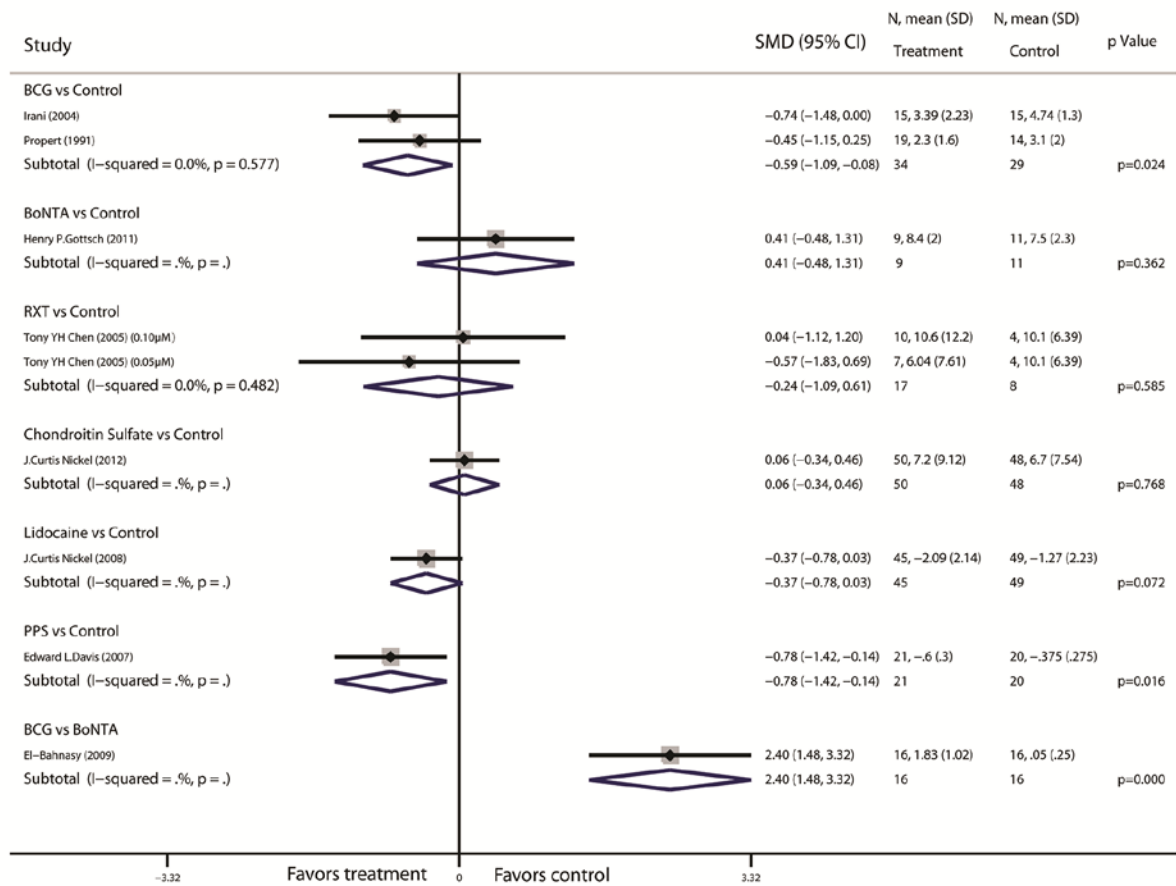

**Figure S4. Results of urinary urgency on IC/PBS patients.**

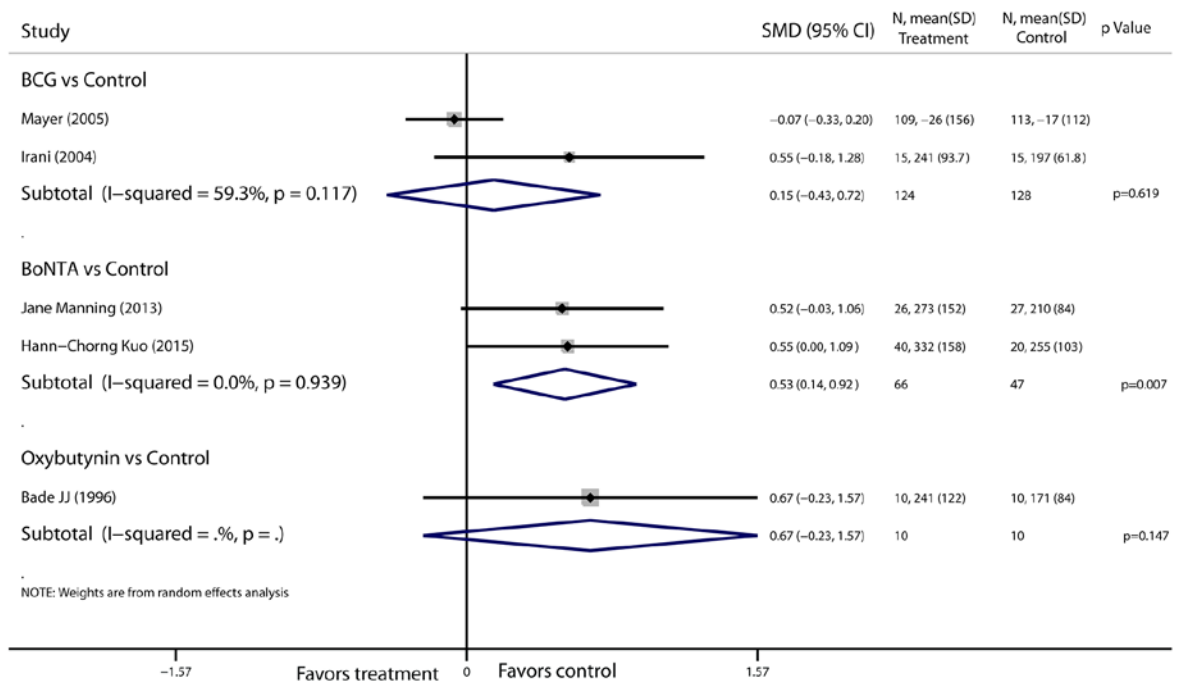

**Figure S5. Results of bladder capacity restore on IC/PBS patients.**
